# Supplementary material
Source: Springer Nature journal article supplement (https://www.springermedizin.de/resource/supplementary/12943_2012_1031_MOESM5_ESM.pdf/9552130)

**A**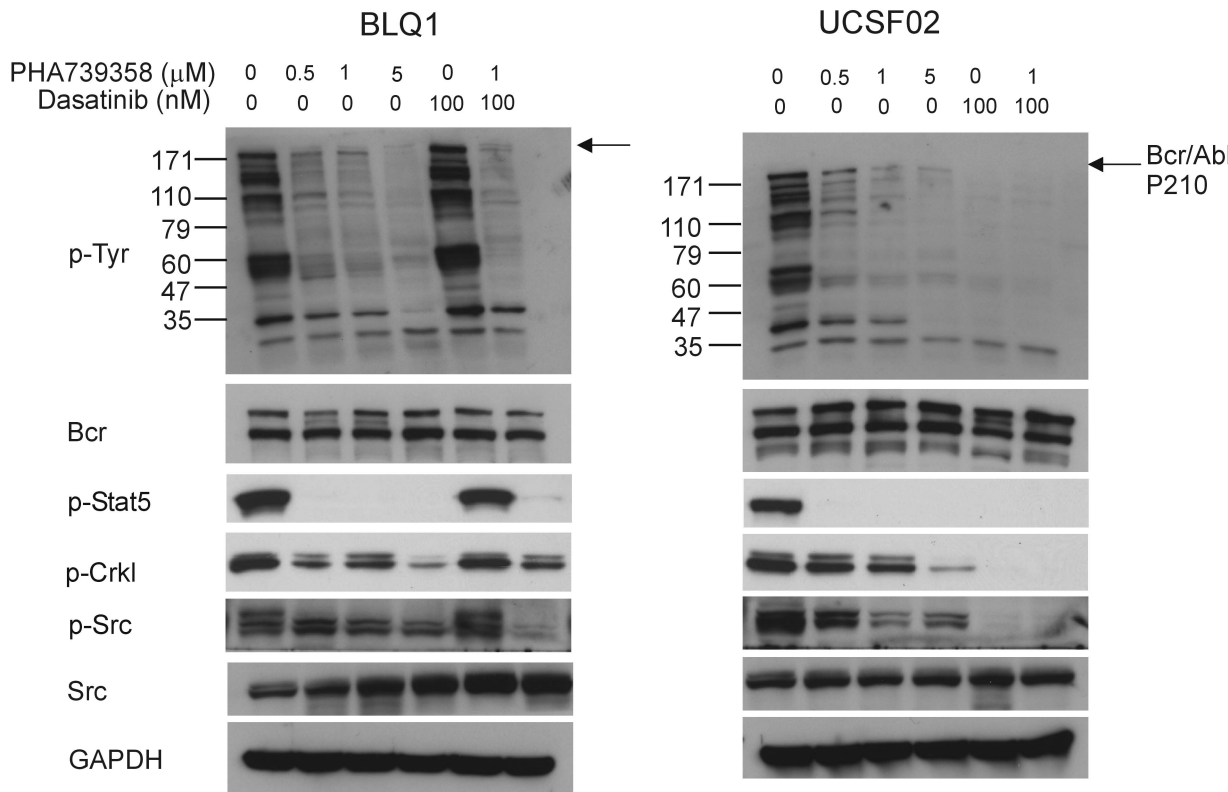**B**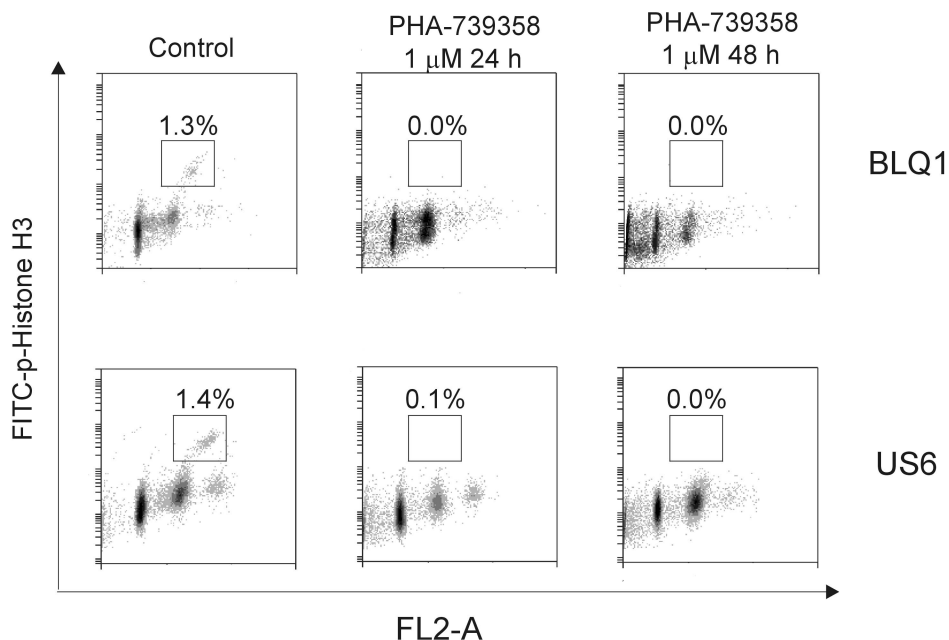

Supplement: MOESM5 [file 9552130]
